# Supplementary material
Source: PubMed Central journal article supplement (PMC8480150)
Supplement: ehp9122.s001.acco.pdf [file ehp9122.s001.acco.pdf]

**Note to readers with disabilities:** *EHP* strives to ensure that all journal content is accessible to all readers. However, some figures and Supplemental Material published in *EHP* articles may not conform to [508 standards](#) due to the complexity of the information being presented. If you need assistance accessing journal content, please contact [ehp508@niehs.nih.gov](mailto:ehp508@niehs.nih.gov). Our staff will work with you to assess and meet your accessibility needs within 3 working days.

### **Supplemental Material**

#### **Drinking Water Disinfection by-Products and Congenital Malformations: A Nationwide Register-Based Prospective Study**

Melle Säve-Söderbergh, Jonas Toljander, Carolina Donat-Vargas, and Agneta Åkesson

#### **Table of Contents**

**Table S1.** Prevalence of major and minor malformations (prevalence >1.5 cases/10,000 births) by chlorination treatment (no chlorination, hypochlorite or chloramine) and exposure to total trihalomethanes (TTHM) in drinking water during the 1<sup>st</sup> trimester of pregnancy. The study included a total of 623,468 children born during 2005-2015 to mothers living in large urban areas (>10,000 inhabitants) in Sweden.

**Table S2.** Associations between total trihalomethanes (TTHM) in municipal drinking water during the 1<sup>st</sup> trimester of pregnancy and major congenital malformations, expressed as odds ratios (OR) and 95% confidence interval (CI), and using <5 µg TTHM/l as reference.

Table S1 Prevalence of major and minor malformations (prevalence >1.5 cases/10,000 births) by chlorination treatment (no chlorination, hypochlorite or chloramine) and exposure to total trihalomethanes (TTHM) in drinking water during the 1<sup>st</sup> trimester of pregnancy. The study included a total of 623,468 children born during 2005-2015 to mothers living in large urban areas (>10,000 inhabitants) in Sweden.

| Malformations                                                    | No chlorination<br>n (%) | Hypochlorite             |                            |                           | Chloramine               |                            |                           |
|------------------------------------------------------------------|--------------------------|--------------------------|----------------------------|---------------------------|--------------------------|----------------------------|---------------------------|
|                                                                  |                          | <5 µg<br>TTHM/L<br>n (%) | 5-15 µg<br>TTHM/L<br>n (%) | >15 µg<br>TTHM/L<br>n (%) | <5 µg<br>TTHM/L<br>n (%) | 5-15 µg<br>TTHM/L<br>n (%) | >15 µg<br>TTHM/L<br>n (%) |
| n                                                                | 65,154                   | 30,883                   | 54,144                     | 48,044                    | 188,428                  | 18,934                     | 40,135                    |
| <b>All malformations</b>                                         | 1,373 (2.1)              | 680 (2.2)                | 1,094 (2.0)                | 936 (1.9)                 | 3,992 (2.1)              | 416 (2.2)                  | 1,042 (2.6)               |
| <b>Nervous system</b>                                            | 37 (0.06)                | 22 (0.07)                | 30 (0.06)                  | 20 (0.04)                 | 78 (0.04)                | 9 (0.05)                   | 36 (0.09)                 |
| Neural Tube Defects                                              | 17 (0.03)                | 6 (0.02)                 | 11 (0.02)                  | 9 (0.02)                  | 15 (0.008)               | 4 (0.02)                   | 8 (0.02)                  |
| <b>Eye</b>                                                       | 12 (0.02)                | 8 (0.03)                 | 28 (0.05)                  | 10 (0.02)                 | 37 (0.02)                | 4 (0.02)                   | 10 (0.01)                 |
| <b>Ear, face and neck</b>                                        | 15 (0.02)                | 8 (0.03)                 | 17 (0.03)                  | 18 (0.04)                 | 58 (0.03)                | 10 (0.05)                  | 18 (0.04)                 |
| <b>Congenital Heart Defects</b>                                  | 586 (0.9)                | 262 (0.8)                | 453 (0.8)                  | 372 (0.8)                 | 1355 (0.7)               | 139 (0.7)                  | 345 (0.9)                 |
| Severe congenital heart defects                                  | 103 (0.2)                | 33 (0.1)                 | 87 (0.2)                   | 66 (0.1)                  | 204 (0.1)                | 29 (0.2)                   | 61 (0.2)                  |
| Transposition of great vessels                                   | 21 (0.03)                | 3 (0.01)                 | 12 (0.02)                  | 12 (0.02)                 | 36 (0.02)                | 6 (0.03)                   | 12 (0.03)                 |
| Ventricular septal defect                                        | 312 (0.5)                | 151 (0.5)                | 258 (0.5)                  | 214 (0.4)                 | 740 (0.4)                | 67 (0.4)                   | 198 (0.5)                 |
| Atrial septal defect                                             | 147 (0.2)                | 35 (0.1)                 | 81 (0.1)                   | 69 (0.1)                  | 150 (0.08)               | 28 (0.1)                   | 88 (0.2)                  |
| Atrioventricular septal Defect                                   | 19 (0.03)                | 4 (0.01)                 | 16 (0.03)                  | 11 (0.02)                 | 42 (0.02)                | 6 (0.03)                   | 13 (0.03)                 |
| Tetralogy of Fallot                                              | 15 (0.02)                | 5 (0.02)                 | 12 (0.02)                  | 13 (0.03)                 | 36 (0.02)                | 2 (0.01)                   | 8 (0.02)                  |
| Pulmonary valve stenosis                                         | 21 (0.03)                | 7 (0.02)                 | 15 (0.03)                  | 9 (0.02)                  | 44 (0.02)                | 3 (0.02)                   | 17 (0.04)                 |
| Coarctation of aorta                                             | 16 (0.02)                | 6 (0.02)                 | 19 (0.04)                  | 12 (0.02)                 | 32 (0.02)                | 6 (0.03)                   | 15 (0.04)                 |
| Patent ductus arteriosus as only in full-term infants            | 67 (0.1)                 | 28 (0.1)                 | 38 (0.07)                  | 34 (0.07)                 | 103 (0.06)               | 18 (0.01)                  | 43 (0.1)                  |
| <b>Respiratory</b>                                               | 9 (0.01)                 | 6 (0.02)                 | 10 (0.02)                  | 6 (0.01)                  | 39 (0.02)                | 5 (0.03)                   | 6 (0.01)                  |
| <b>Oro-facial clefts</b>                                         | 107 (0.2)                | 44 (0.1)                 | 87 (0.2)                   | 64 (0.1)                  | 247 (0.1)                | 27 (0.1)                   | 51 (0.1)                  |
| Cleft lip with or without cleft palate                           | 66 (0.1)                 | 26 (0.08)                | 54 (0.1)                   | 31 (0.06)                 | 151 (0.08)               | 15 (0.08)                  | 31 (0.08)                 |
| Cleft palate                                                     | 42 (0.06)                | 18 (0.06)                | 54 (0.06)                  | 34 (0.07)                 | 97 (0.05)                | 11 (0.06)                  | 20 (0.05)                 |
| <b>Digestive system</b>                                          | 87 (0.1)                 | 37 (0.1)                 | 70 (0.1)                   | 77 (0.2)                  | 202 (0.1)                | 14 (0.07)                  | 54 (0.1)                  |
| Oesophageal atresia with or without trachea- oesophageal fistula | 18 (0.03)                | 9 (0.03)                 | 10 (0.02)                  | 14 (0.03)                 | 38 (0.02)                | 2 (0.01)                   | 9 (0.02)                  |
| Ano-rectal atresia and stenosis                                  | 20 (0.03)                | 7 (0.02)                 | 18 (0.03)                  | 17 (0.04)                 | 47 (0.02)                | 1 (0.005)                  | 8 (0.02)                  |
| Diaphragmatic hernia                                             | 11 (0.02)                | 6 (0.02)                 | 9 (0.02)                   | 9 (0.02)                  | 27 (0.01)                | 2 (0.01)                   | 8 (0.02)                  |
| <b>Abdominal wall defects</b>                                    | 19 (0.03)                | 10 (0.03)                | 13 (0.02)                  | 13 (0.03)                 | 28 (0.01)                | 1 (0.005)                  | 7 (0.02)                  |
| <b>Urinary</b>                                                   | 101 (0.2)                | 63 (0.2)                 | 72 (0.1)                   | 62 (0.1)                  | 668 (0.4)                | 66 (0.3)                   | 128 (0.3)                 |
| Congenital hydronephrosis                                        | 71 (0.1)                 | 43 (0.1)                 | 46 (0.08)                  | 42 (0.08)                 | 562 (0.3)                | 60 (0.3)                   | 89 (0.2)                  |
| <b>Genital</b>                                                   | 161 (0.2)                | 97 (0.3)                 | 167 (0.3)                  | 145 (0.3)                 | 544 (0.3)                | 63 (0.3)                   | 178 (0.4)                 |
| Hypospadias                                                      | 150 (0.2)                | 94 (0.3)                 | 154 (0.3)                  | 134 (0.3)                 | 510 (0.3)                | 60 (0.3)                   | 164 (0.4)                 |
| <b>Limbs</b>                                                     | 274 (0.4)                | 146 (0.5)                | 230 (0.4)                  | 184 (0.4)                 | 864 (0.5)                | 91 (0.5)                   | 232 (0.6)                 |
| Limb reduction defects                                           | 15 (0.02)                | 11 (0.04)                | 21 (0.04)                  | 13 (0.03)                 | 48 (0.03)                | 13 (0.07)                  | 8 (0.02)                  |
| Club foot – talipes equinovarus                                  | 64 (0.1)                 | 43 (0.1)                 | 58 (0.1)                   | 46 (0.1)                  | 172 (0.09)               | 16 (0.08)                  | 50 (0.1)                  |
| Hip dislocation and /or dysplasia                                | 51 (0.08)                | 14 (0.05)                | 33 (0.06)                  | 46 (0.1)                  | 153 (0.08)               | 16 (0.08)                  | 66 (0.2)                  |
| Polydactyly                                                      | 71 (0.1)                 | 33 (0.1)                 | 54 (0.1)                   | 45 (0.09)                 | 220 (0.1)                | 19 (0.1)                   | 57 (0.1)                  |
| Syndactyly                                                       | 40 (0.06)                | 28 (0.09)                | 33 (0.06)                  | 24 (0.05)                 | 158 (0.08)               | 20 (0.1)                   | 36 (0.09)                 |
| <b>Chromosomal</b>                                               | 88 (0.1)                 | 39 (0.1)                 | 61 (0.1)                   | 68 (0.1)                  | 245 (0.1)                | 24 (0.1)                   | 49 (0.1)                  |
| Down syndrome                                                    | 68 (0.1)                 | 29 (0.09)                | 49 (0.09)                  | 57 (0.1)                  | 190 (0.1)                | 19 (0.1)                   | 33 (0.08)                 |

Table S2 Associations between total trihalomethanes (TTHM) in municipal drinking water during the 1<sup>st</sup> trimester of pregnancy and major congenital malformations, expressed as odds ratios (OR) and 95% confidence interval (CI), and using <5 µg TTHM/l as reference.

| Congenital malformations | Chlorination treatment |                        | <5 µg TTHM/l<br>OR (95% CI) | 5-15 µg TTHM/l<br>OR (95% CI) | >15 µg TTHM/l<br>OR (95% CI) | p-trend |
|--------------------------|------------------------|------------------------|-----------------------------|-------------------------------|------------------------------|---------|
| Nervous system           | Hypochlorite           | Cases (n)              | 22                          | 30                            | 20                           |         |
|                          |                        | Non-cases (n)          | 30,861                      | 54,114                        | 48,024                       |         |
|                          |                        | Multivariable adjusted | 1.00 (ref)                  | 0.81 (0.44-1.50)              | 0.56 (0.28-1.11)             | 0.1     |
|                          | Chloramine             | Cases (n)              | 78                          | 9                             | 36                           |         |
|                          |                        | Non-cases (n)          | 188,350                     | 18,925                        | 40,099                       |         |
|                          |                        | Multivariable adjusted | 1.00 (ref)                  | 0.81 (0.34-1.90)              | 1.99 (1.29-3.08)             | 0.02    |
| Heart Defects            | Hypochlorite           | Cases (n)              | 2,218                       | 1,185                         | 723                          |         |
|                          |                        | Non-cases (n)          | 287,697                     | 177,997                       | 88,494                       |         |
|                          |                        | Multivariable adjusted | 1.00 (ref)                  | 1.02 (0.86-1.20)              | 0.94 (0.79-1.12)             | 0.5     |
|                          | Chloramine             | Cases (n)              | 1,355                       | 139                           | 345                          |         |
|                          |                        | Non-cases (n)          | 187,073                     | 18,795                        | 39,790                       |         |
|                          |                        | Multivariable adjusted | 1.00 (ref)                  | 0.98 (0.80-1.20)              | 1.24 (1.09-1.41)             | 0.001   |
| Oro-facial clefts        | Hypochlorite           | Cases (n)              | 44                          | 87                            | 64                           |         |
|                          |                        | Non-cases (n)          | 30,839                      | 54,057                        | 47,980                       |         |
|                          |                        | Multivariable adjusted | 1.00 (ref)                  | 1.08 (0.73-1.58)              | 0.99 (0.66-1.48)             | 0.9     |
|                          | Chloramine             | Cases (n)              | 247                         | 27                            | 51                           |         |
|                          |                        | Non-cases (n)          | 188,181                     | 18,907                        | 40,084                       |         |
|                          |                        | Multivariable adjusted | 1.00 (ref)                  | 1.13 (0.74-1.73)              | 0.93 (0.67-1.29)             | 0.6     |
| Digestive system         | Hypochlorite           | Cases (n)              | 37                          | 70                            | 77                           |         |
|                          |                        | Non-cases (n)          | 30,846                      | 54,074                        | 47,967                       |         |
|                          |                        | Multivariable adjusted | 1.00 (ref)                  | 1.01 (0.64-1.58)              | 1.34 (0.87-2.08)             | 0.2     |
|                          | Chloramine             | Cases (n)              | 202                         | 14                            | 54                           |         |
|                          |                        | Non-cases (n)          | 188,226                     | 18,920                        | 40,081                       |         |
|                          |                        | Multivariable adjusted | 1.00 (ref)                  | 0.63 (0.34-1.16)              | 1.26 (0.91-1.76)             | 0.2     |
| Urinary                  | Hypochlorite           | Cases (n)              | 63                          | 72                            | 62                           |         |
|                          |                        | Non-cases (n)          | 30,820                      | 54,072                        | 47,982                       |         |
|                          |                        | Multivariable adjusted | 1.00 (ref)                  | 0.64 (0.44-0.92)              | 0.65 (0.45-0.94)             | 0.02    |
|                          | Chloramine             | Cases (n)              | 668                         | 66                            | 128                          |         |
|                          |                        | Non-cases (n)          | 187,760                     | 18,868                        | 40,007                       |         |
|                          |                        | Multivariable adjusted | 1.00 (ref)                  | 1.06 (0.80-1.40)              | 0.89 (0.72-1.09)             | 0.3     |
| Genital                  | Hypochlorite           | Cases (n)              | 97                          | 167                           | 145                          |         |
|                          |                        | Non-cases (n)          | 30,786                      | 53,977                        | 47,899                       |         |
|                          |                        | Multivariable adjusted | 1.00 (ref)                  | 0.96 (0.74-1.25)              | 0.91 (0.69-1.19)             | 0.5     |
|                          | Chloramine             | Cases (n)              | 544                         | 63                            | 178                          |         |
|                          |                        | Non-cases (n)          | 187,884                     | 18,871                        | 39,957                       |         |
|                          |                        | Multivariable adjusted | 1.00 (ref)                  | 1.21 (0.92-1.60)              | 1.50 (1.24-1.81)             | <0.001  |
| Limbs                    | Hypochlorite           | Cases (n)              | 146                         | 230                           | 194                          |         |
|                          |                        | Non-cases (n)          | 30,737                      | 53,914                        | 47,850                       |         |
|                          |                        | Multivariable adjusted | 1.00 (ref)                  | 0.89 (0.71-1.11)              | 0.87 (0.70-1.10)             | 0.2     |
|                          | Chloramine             | Cases (n)              | 864                         | 91                            | 232                          |         |
|                          |                        | Non-cases (n)          | 187,564                     | 18,843                        | 39,903                       |         |
|                          |                        | Multivariable adjusted | 1.00 (ref)                  | 0.96 (0.75-1.23)              | 1.27 (1.08-1.49)             | 0.004   |

|             |              |                        |            |                  |                  |     |
|-------------|--------------|------------------------|------------|------------------|------------------|-----|
| Chromosomal | Hypochlorite | Cases (n)              | 39         | 61               | 68               |     |
|             |              | Non-cases (n)          | 30,844     | 54,083           | 47,976           |     |
|             |              | Multivariable adjusted | 1.00 (ref) | 0.94 (0.60-1.47) | 1.15 (0.74-1.79) | 0.6 |
|             | Chloramine   | Cases (n)              | 245        | 24               | 49               |     |
|             |              | Non-cases (n)          | 188,183    | 18,910           | 40,086           |     |
|             |              | Multivariable adjusted | 1.00 (ref) | 0.80 (0.48-1.33) | 1.09 (0.79-1.50) | 0.6 |

Models multivariable-adjusted for the following factors: maternal age, BMI (body mass index), diabetes, any use of teratogenic drugs, parity, smoking at registration to the antenatal care, highest attained education and household income using inverse probability weighting.
