# Supplementary material
Source: PubMed Central journal article supplement (PMC8480150)
Supplement: ehp9122.smcontents.508.pdf [file ehp9122.smcontents.508.pdf]

**Note to readers with disabilities:** *EHP* strives to ensure that all journal content is accessible to all readers. However, some figures and Supplemental Material published in *EHP* articles may not conform to [508 standards](#) due to the complexity of the information being presented. If you need assistance accessing journal content, please contact [ehp508@niehs.nih.gov](mailto:ehp508@niehs.nih.gov). Our staff will work with you to assess and meet your accessibility needs within 3 working days.

### **Supplemental Material**

#### **Drinking Water Disinfection by-Products and Congenital Malformations: A Nationwide Register-Based Prospective Study**

Melle Säve-Söderbergh, Jonas Toljander, Carolina Donat-Vargas, and Agneta Åkesson

#### **Table of Contents**

**Table S1.** Prevalence of major and minor malformations (prevalence >1.5 cases/10,000 births) by chlorination treatment (no chlorination, hypochlorite or chloramine) and exposure to total trihalomethanes (TTHM) in drinking water during the 1<sup>st</sup> trimester of pregnancy. The study included a total of 623,468 children born during 2005-2015 to mothers living in large urban areas (>10,000 inhabitants) in Sweden.

**Table S2.** Associations between total trihalomethanes (TTHM) in municipal drinking water during the 1<sup>st</sup> trimester of pregnancy and major congenital malformations, expressed as odds ratios (OR) and 95% confidence interval (CI), and using <5 µg TTHM/l as reference.
